# Supplementary material for: Genome-wide association study using specific-locus amplified fragment sequencing identifies new genes influencing nitrogen use efficiency in rice landraces
Source: Front Plant Sci. 2023 Jul 14;14:1126254. doi: 10.3389/fpls.2023.1126254 (PMC10375723; doi:10.3389/fpls.2023.1126254)
Supplement: Supplementary file 3 [file Table_2.xlsx]

## Sheet: MLM
Significant loci for genome-wide association analysis of MLM
Traits	Chr	Position	p
PH	1	32712980	1.81655e-09
PH	1	33441505	5.16521e-08
PH	1	38730952	8.69215e-08
PH	6	20714026	5.42173e-08
PFW	1	37886209	1.74918e-16
PFW	1	37886365	3.60868e-12
PFW	1	37886409	3.70292e-12
PFW	1	30046961	7.88769e-12
PFW	1	35339894	2.87633e-09
PFW	1	16754252	8.19633e-09
PFW	1	31781417	9.48705e-09
PFW	1	17831023	1.77405e-08
PFW	1	16510099	5.71476e-08
PFW	2	30716390	7.8301e-14
PFW	2	30716371	8.06288e-14
PFW	2	21407388	5.72244e-11
PFW	2	12160043	1.13307e-08
PFW	2	13657561	5.22322e-08
PFW	2	16225232	1.21276e-07
PFW	2	6234701	1.71651e-07
PFW	3	13430179	2.88954e-17
PFW	3	34339531	2.91246e-10
PFW	3	27751184	1.07777e-09
PFW	3	1468300	1.69378e-09
PFW	3	16526608	1.29895e-08
PFW	3	735891	3.32179e-08
PFW	4	10949484	1.01344e-15
PFW	4	26886725	1.61835e-09
PFW	4	3196309	4.75849e-09
PFW	4	12126669	1.10029e-08
PFW	4	12789254	1.33671e-08
PFW	4	21781046	1.96985e-08
PFW	4	18828090	1.01436e-07
PFW	4	2066092	2.03504e-07
PFW	5	29804690	6.4507e-17
PFW	5	29804720	2.22478e-10
PFW	5	8547490	1.78056e-09
PFW	5	10158556	1.82098e-09
PFW	5	20642533	1.10984e-08
PFW	5	29836293	1.48462e-07
PFW	6	22872847	3.60781e-17
PFW	6	22875810	7.97428e-17
PFW	6	25137177	1.55661e-11
PFW	6	25137204	8.79987e-11
PFW	6	20810229	2.70359e-09
PFW	6	16790708	3.65289e-08
PFW	6	15557691	5.02794e-08
PFW	6	14819466	1.80442e-07
PFW	7	9596379	2.35197e-09
PFW	7	29611964	5.1135e-09
PFW	7	6565220	1.96944e-08
PFW	8	14852502	2.65828e-17
PFW	8	7032961	3.97905e-17
PFW	8	7063395	5.07141e-17
PFW	8	10544912	5.02462e-16
PFW	8	25958079	3.38374e-10
PFW	8	1977906	1.13835e-08
PFW	8	6923604	1.31065e-08
PFW	8	19616017	7.10908e-08
PFW	9	15096464	3.11357e-11
PFW	9	15096454	3.58159e-11
PFW	9	15096477	1.33786e-10
PFW	9	15096458	3.37256e-09
PFW	9	22635279	7.25038e-09
PFW	9	22939953	1.55691e-08
PFW	9	911347	5.33124e-08
PFW	10	5085250	6.33289e-17
PFW	10	19418611	2.12415e-13
PFW	10	21705001	1.7141e-10
PFW	10	21602219	2.39158e-10
PFW	10	5085254	1.48845e-08
PFW	10	3366633	1.23613e-07
PFW	11	18766142	2.61723e-17
PFW	11	16350032	2.51779e-13
PFW	11	15042774	1.45075e-07
PFW	12	17877191	7.43318e-17
PFW	12	6295540	3.53644e-15
PFW	12	10569545	7.46803e-11
PFW	12	7148735	1.88852e-07
PFW	12	6114540	2.01968e-07
PDW	1	37886209	2.04003e-17
PDW	1	37886409	5.97149e-11
PDW	1	37886365	6.11994e-11
PDW	1	31781417	7.25865e-11
PDW	1	30046961	1.99059e-10
PDW	1	35339894	1.65923e-09
PDW	1	16767253	4.33951e-09
PDW	1	16510099	4.61559e-09
PDW	1	17831023	5.47557e-09
PDW	1	16754252	8.16029e-09
PDW	1	16260445	3.22814e-08
PDW	1	26912003	1.33012e-07
PDW	2	30716390	8.15898e-15
PDW	2	30716371	8.2751e-15
PDW	2	21407388	9.40109e-12
PDW	2	16225232	7.89419e-09
PDW	2	6234701	2.41854e-08
PDW	2	6955855	4.87873e-08
PDW	2	12160043	8.55716e-08
PDW	2	28142974	9.83117e-08
PDW	3	13430179	2.31105e-18
PDW	3	27751184	1.73858e-10
PDW	3	34339531	4.60873e-10
PDW	3	1468300	8.30231e-10
PDW	3	16526608	6.76185e-09
PDW	3	735891	4.4998e-08
PDW	4	10949484	1.16439e-16
PDW	4	26886725	6.31184e-10
PDW	4	3196309	1.34052e-09
PDW	4	12789254	2.31002e-08
PDW	4	21781046	2.49439e-08
PDW	4	28160628	3.06245e-08
PDW	4	28160597	3.06736e-08
PDW	4	12126669	3.15188e-08
PDW	4	30171095	4.65706e-08
PDW	4	30171094	4.67413e-08
PDW	4	2066092	5.96967e-08
PDW	4	14212114	1.31669e-07
PDW	4	18828090	1.90307e-07
PDW	5	29804690	3.88988e-18
PDW	5	29804720	1.48921e-10
PDW	5	8547490	3.38653e-09
PDW	5	20642533	6.90206e-09
PDW	5	10158556	3.8835e-08
PDW	5	12584983	4.2474e-08
PDW	5	5343656	4.44433e-08
PDW	5	12584970	4.52529e-08
PDW	5	981794	1.0539e-07
PDW	6	22872847	2.31763e-18
PDW	6	22875810	6.78995e-18
PDW	6	25137177	3.62828e-11
PDW	6	20810229	4.56148e-10
PDW	6	25137204	9.05034e-10
PDW	6	14819466	5.59768e-09
PDW	6	3625081	3.54344e-08
PDW	6	21401542	8.23532e-08
PDW	6	15557691	1.21409e-07
PDW	6	29837500	1.29786e-07
PDW	6	16790708	1.34911e-07
PDW	6	2576876	1.81499e-07
PDW	6	30329236	2.09824e-07
PDW	7	29611964	7.04928e-09
PDW	7	9596379	8.53174e-09
PDW	7	25201286	1.56043e-07
PDW	7	201571	2.01711e-07
PDW	8	14852502	2.59102e-18
PDW	8	7032961	2.67499e-18
PDW	8	7063395	4.18917e-18
PDW	8	10544912	7.29254e-17
PDW	8	1977906	7.22369e-11
PDW	8	25958079	4.49485e-10
PDW	8	19616017	1.72577e-09
PDW	8	6923604	6.66562e-08
PDW	8	13089465	9.09739e-08
PDW	9	15096464	1.08327e-11
PDW	9	15096454	1.31821e-11
PDW	9	15096477	7.99256e-11
PDW	9	15096458	1.94184e-09
PDW	9	22635279	3.26961e-09
PDW	9	911347	5.27117e-09
PDW	9	22939953	2.35787e-08
PDW	9	16201538	2.07748e-07
PDW	10	5085250	5.22665e-18
PDW	10	19418611	5.91452e-12
PDW	10	21705001	2.70332e-11
PDW	10	21602219	1.7227e-08
PDW	10	5085254	2.3276e-08
PDW	10	3366633	3.7146e-08
PDW	10	6580094	3.93193e-08
PDW	10	9048030	1.88078e-07
PDW	11	18766142	1.94648e-18
PDW	11	16350032	3.36185e-12
PDW	11	15042774	3.72294e-08
PDW	12	17877191	4.70401e-18
PDW	12	6295540	1.36693e-15
PDW	12	10569545	5.45165e-11
PDW	12	6114540	2.34929e-07
RSA	1	37886209	1.47123e-15
RSA	1	16754252	2.25489e-14
RSA	1	20681967	7.40764e-12
RSA	1	20681951	1.69458e-11
RSA	1	37886365	4.98333e-11
RSA	1	37886409	5.00234e-11
RSA	1	31781417	8.7932e-10
RSA	1	35339894	3.3148e-09
RSA	1	18528525	2.11771e-08
RSA	1	35486889	6.41976e-08
RSA	1	30046961	1.27536e-07
RSA	1	15395867	1.46414e-07
RSA	2	30716371	4.47782e-11
RSA	2	30716390	4.49806e-11
RSA	2	16225232	3.30784e-09
RSA	2	21407388	1.37452e-08
RSA	2	28142974	1.48182e-08
RSA	2	6234701	1.94032e-07
RSA	3	13430179	2.89296e-16
RSA	3	34339531	3.60832e-10
RSA	3	34356419	5.86187e-10
RSA	3	34356425	5.86187e-10
RSA	3	27751184	3.91413e-08
RSA	3	34356378	9.00351e-08
RSA	3	34356429	9.04279e-08
RSA	3	34356432	9.04279e-08
RSA	3	565167	2.29677e-07
RSA	4	10949484	1.71011e-15
RSA	4	18429399	7.49518e-09
RSA	4	14212114	1.20509e-08
RSA	4	12126669	4.01171e-08
RSA	4	3196309	4.29264e-08
RSA	4	21781046	1.09426e-07
RSA	4	28160597	1.65235e-07
RSA	4	28160628	1.65442e-07
RSA	4	18828090	2.23068e-07
RSA	4	32505556	2.31782e-07
RSA	5	29804690	2.18485e-16
RSA	5	8547490	2.10078e-10
RSA	5	29804720	1.89272e-09
RSA	5	6117508	1.19141e-08
RSA	5	6117514	1.20087e-08
RSA	6	22872847	2.06031e-16
RSA	6	22875810	4.04195e-16
RSA	6	21401542	7.63013e-11
RSA	6	14819466	3.46777e-10
RSA	6	13690682	1.52433e-09
RSA	6	30329236	2.85341e-09
RSA	6	25137177	1.02173e-08
RSA	6	20810229	1.75874e-08
RSA	6	10332062	2.89771e-08
RSA	6	25137204	4.22507e-08
RSA	6	20773209	6.23049e-08
RSA	6	9384419	2.26421e-07
RSA	7	26515557	4.39535e-10
RSA	7	6565220	7.96401e-10
RSA	7	29611964	3.41327e-09
RSA	8	7063395	1.97925e-16
RSA	8	7032961	2.16337e-16
RSA	8	14852502	2.63738e-16
RSA	8	10544912	1.46475e-15
RSA	8	6923604	9.82253e-10
RSA	8	19616017	6.25623e-09
RSA	8	25958079	7.10432e-08
RSA	9	22635279	3.10665e-15
RSA	9	15096464	1.34308e-08
RSA	9	15096454	1.39685e-08
RSA	9	15096477	1.46645e-08
RSA	9	15096458	1.73609e-08
RSA	9	9727794	5.56026e-08
RSA	9	911347	6.82998e-08
RSA	9	8413030	1.0217e-07
RSA	9	1698798	1.2763e-07
RSA	10	5085250	5.10217e-16
RSA	10	19418611	5.49364e-12
RSA	10	21705001	1.94086e-10
RSA	10	3366633	1.4733e-08
RSA	10	21602219	3.46974e-08
RSA	10	5085254	6.89098e-08
RSA	10	1217866	8.3419e-08
RSA	10	2308623	1.62121e-07
RSA	11	18766142	9.54016e-17
RSA	11	16350032	3.42234e-09
RSA	11	15042774	1.65077e-08
RSA	12	17877191	2.22115e-16
RSA	12	6295540	4.86123e-11
RSA	12	10569545	1.66183e-10
RSA	12	6114540	2.25508e-08
RSA	12	11987701	9.39188e-08
RBN	1	15395867	1.34227e-10
RBN	1	19932351	1.08634e-09
RBN	1	18357746	1.70355e-09
RBN	1	18357810	1.70845e-09
RBN	1	16754221	3.26641e-09
RBN	1	16783509	1.00621e-08
RBN	1	15141997	5.67328e-08
RBN	1	14804333	1.27571e-07
RBN	1	32347347	1.48794e-07
RBN	2	27890779	1.03797e-09
RBN	2	23352008	3.47177e-09
RBN	2	32491137	6.28242e-08
RBN	2	31726874	1.59779e-07
RBN	2	31726857	1.81606e-07
RBN	2	31726864	1.81606e-07
RBN	2	15863890	1.87274e-07
RBN	3	565167	9.03113e-10
RBN	3	565174	1.06791e-09
RBN	3	565162	1.09196e-09
RBN	3	35590931	1.3899e-09
RBN	3	35590963	1.99508e-09
RBN	3	18173978	2.62355e-09
RBN	3	11377549	4.42635e-09
RBN	3	397997	5.04097e-09
RBN	3	4620593	5.38677e-08
RBN	3	5456942	8.44009e-08
RBN	3	2279966	2.019e-07
RBN	4	22700330	1.79087e-11
RBN	4	29918449	4.40427e-11
RBN	4	6036008	2.24651e-10
RBN	4	2905124	4.37151e-09
RBN	4	26873369	4.63599e-09
RBN	4	15148592	8.93239e-09
RBN	4	2639899	1.37878e-08
RBN	4	3743976	1.60193e-08
RBN	4	33543651	7.50509e-08
RBN	5	6117508	2.01526e-15
RBN	5	6117514	2.60881e-15
RBN	5	29956584	8.05778e-11
RBN	5	9707359	1.03007e-10
RBN	5	6117754	1.80434e-09
RBN	5	29956595	2.45963e-09
RBN	5	29931695	8.30715e-09
RBN	5	26616604	1.10988e-07
RBN	5	26616603	1.10988e-07
RBN	5	7110442	2.15656e-07
RBN	6	9384419	1.41358e-11
RBN	6	22481729	2.73089e-10
RBN	6	22481738	7.63034e-10
RBN	6	77046	8.24005e-10
RBN	6	11415699	2.06186e-09
RBN	6	23017215	1.17401e-07
RBN	7	8259117	2.5857e-10
RBN	7	9591237	4.14132e-10
RBN	7	7327438	7.22846e-10
RBN	7	8332502	1.0121e-09
RBN	7	9596196	2.08117e-09
RBN	7	8036030	4.05182e-09
RBN	7	28283115	1.00022e-08
RBN	7	4174564	2.75495e-08
RBN	7	8052721	2.84768e-08
RBN	8	12638075	4.83334e-158
RBN	8	28270880	2.22657e-10
RBN	8	7070034	1.20333e-09
RBN	8	6925339	3.03327e-09
RBN	8	7089185	5.17948e-09
RBN	8	18383343	2.36982e-07
RBN	9	8142373	2.42731e-09
RBN	9	9339124	2.81372e-09
RBN	9	6131572	4.18616e-08
RBN	9	8228887	1.86439e-07
RBN	10	5396950	1.05872e-09
RBN	10	3147839	8.12088e-09
RBN	10	5092140	1.22548e-07
RBN	11	16495661	2.40735e-10
RBN	11	16495420	2.8071e-10
RBN	11	18766174	1.78356e-09
RBN	11	18766150	2.27032e-09
RBN	11	23238005	2.6625e-09
RBN	11	23879404	1.22978e-08
RBN	11	19817611	1.29546e-07
RBN	12	4793852	3.95535e-10
RBN	12	26804327	6.76058e-10
RBN	12	21378387	2.47181e-09
RBN	12	20918778	2.57145e-09
RBN	12	4573752	1.03147e-07
RBN	12	4573723	1.28788e-07
RFDN	1	22845942	3.9593e-202
RFDN	1	37886209	9.77784e-09
RFDN	1	16754252	2.84434e-08
RFDN	1	35339894	2.97187e-08
RFDN	1	35339832	1.10818e-07
RFDN	3	13469222	3.64282e-275
RFDN	3	13430179	8.97669e-08
RFDN	4	12126669	4.51185e-08
RFDN	4	10949484	8.1459e-08
RFDN	4	12126680	1.90826e-07
RFDN	5	29804690	1.60495e-07
RFDN	6	22875810	4.67368e-08
RFDN	6	22872847	9.94554e-08
RFDN	7	15834148	9.08508e-09
RFDN	8	14852502	3.56739e-08
RFDN	8	10544912	5.01726e-08
RFDN	8	28432759	5.84147e-08
RFDN	8	7032961	1.08069e-07
RFDN	8	7063395	1.24538e-07
RFDN	9	911347	2.10956e-10
RFDN	10	19418611	2.41022e-08
RFDN	10	21602219	4.01651e-08
RFDN	10	5085250	5.83846e-08
RFDN	12	17877191	7.70729e-08
RN	1	16754221	2.4291e-12
RN	1	15395867	2.82956e-12
RN	1	19932351	8.3797e-11
RN	1	16783509	1.34873e-10
RN	1	18357746	2.05784e-10
RN	1	18357810	2.06258e-10
RN	1	18261700	1.34823e-09
RN	1	14804333	2.34667e-08
RN	1	18604303	3.93931e-08
RN	1	1777809	7.94122e-08
RN	1	15141997	8.34306e-08
RN	1	11838798	1.50868e-07
RN	1	15194397	1.97658e-07
RN	1	15194358	1.97658e-07
RN	1	27856592	2.11797e-07
RN	2	23352008	1.55993e-11
RN	2	13658888	2.78529e-09
RN	2	27890779	7.01562e-09
RN	2	15863890	1.40865e-07
RN	2	32491137	2.09914e-07
RN	3	565167	1.21371e-11
RN	3	565174	1.22498e-11
RN	3	565162	1.25274e-11
RN	3	35590931	1.6677e-11
RN	3	35590963	2.10488e-11
RN	3	18173978	2.59811e-11
RN	3	11377549	8.25866e-11
RN	3	4620593	2.50427e-08
RN	3	565155	5.98005e-08
RN	3	31903473	1.32369e-07
RN	3	14104705	2.14273e-07
RN	4	2905124	9.42076e-13
RN	4	22700330	1.10326e-11
RN	4	6036008	2.52506e-11
RN	4	26873369	2.49185e-10
RN	4	14117314	1.37362e-09
RN	4	10109288	2.17625e-09
RN	4	26892666	3.19129e-09
RN	4	29918449	4.01949e-09
RN	4	2360635	1.62228e-07
RN	5	6117508	7.90307e-16
RN	5	6117514	1.00588e-15
RN	5	29956584	6.5181e-12
RN	5	9707359	1.90836e-10
RN	5	6117754	1.10871e-09
RN	5	29956595	1.82435e-08
RN	5	29921745	3.97166e-08
RN	5	29931695	8.98352e-08
RN	5	26616604	1.88321e-07
RN	5	26616603	1.88321e-07
RN	5	29842470	2.02509e-07
RN	6	9384419	9.72606e-13
RN	6	11415699	3.02422e-12
RN	6	22481729	7.01797e-12
RN	6	22481738	2.03812e-11
RN	6	77046	2.68719e-09
RN	6	19215381	1.80276e-07
RN	6	19215395	1.87794e-07
RN	7	8259117	4.09268e-13
RN	7	8332502	4.03339e-12
RN	7	9591237	8.10687e-12
RN	7	7327438	8.44476e-12
RN	7	8036030	1.26924e-10
RN	7	4174564	4.27464e-10
RN	7	8310103	9.33532e-09
RN	7	19939610	6.21478e-08
RN	7	8052721	1.85161e-07
RN	7	19582245	2.28867e-07
RN	8	28270880	2.9093e-13
RN	8	7070034	1.31259e-11
RN	8	6925339	1.47024e-11
RN	8	7089185	6.21509e-09
RN	8	14146562	1.99194e-07
RN	9	9339124	2.5601e-11
RN	9	8142373	5.0482e-11
RN	9	22967069	2.18322e-07
RN	10	5092140	4.44387e-10
RN	10	17540654	1.69411e-09
RN	10	19046870	9.23939e-08
RN	11	16495420	4.71732e-12
RN	11	16495661	5.92567e-12
RN	11	23238005	3.94728e-11
RN	12	4793852	1.45621e-13
RN	12	20918778	2.65858e-11
RN	12	21378387	2.85664e-11
RN	12	4573752	1.00614e-10
RN	12	4573723	1.16579e-10
RN	12	4777305	1.33411e-09
RN	12	19384336	5.39581e-08
RN	12	10089719	6.12005e-08
RN	12	4715708	8.38232e-08
RN	12	3624280	1.33809e-07
RN	12	4246263	1.58871e-07
RNN	1	16754221	4.50223e-13
RNN	1	15395867	8.5976e-13
RNN	1	19932351	3.1565e-11
RNN	1	16783509	3.78954e-11
RNN	1	18357746	2.11518e-10
RNN	1	18357810	2.12172e-10
RNN	1	18261700	2.05285e-09
RNN	1	16754252	3.5525e-09
RNN	1	1777809	8.19451e-09
RNN	1	18604303	1.83993e-08
RNN	1	15141997	2.49088e-08
RNN	1	15194358	8.93998e-08
RNN	1	15194397	8.93998e-08
RNN	1	27856592	1.11149e-07
RNN	1	28670500	1.61393e-07
RNN	1	28670502	1.61393e-07
RNN	1	28670512	1.61393e-07
RNN	1	11838798	1.75337e-07
RNN	1	18754125	2.2688e-07
RNN	1	28160095	2.38077e-07
RNN	2	23352008	5.34158e-12
RNN	2	27890779	9.09856e-10
RNN	2	13658888	7.10852e-09
RNN	2	15863890	3.7122e-08
RNN	2	32491137	5.50866e-08
RNN	3	565167	2.38075e-12
RNN	3	565174	2.45729e-12
RNN	3	565162	3.0673e-12
RNN	3	35590931	3.17457e-12
RNN	3	35590963	4.85058e-12
RNN	3	18173978	6.25493e-12
RNN	3	11377549	1.58817e-11
RNN	3	14104705	5.84327e-09
RNN	3	4620593	9.09036e-09
RNN	3	14104700	2.04094e-08
RNN	3	565155	3.42614e-08
RNN	3	397997	8.37861e-08
RNN	3	6610192	1.13109e-07
RNN	3	36055851	2.28899e-07
RNN	4	2905124	2.5935e-12
RNN	4	22700330	4.59769e-12
RNN	4	6036008	1.49091e-11
RNN	4	26873369	1.21702e-10
RNN	4	29918449	7.93216e-10
RNN	4	10109288	2.4815e-09
RNN	4	14117314	6.24351e-09
RNN	4	26892666	7.67767e-09
RNN	4	15148592	8.14705e-08
RNN	4	33543651	2.03386e-07
RNN	5	6117508	4.51547e-17
RNN	5	6117514	4.97427e-17
RNN	5	29956584	1.69419e-12
RNN	5	6117754	8.80673e-11
RNN	5	9707359	2.19585e-10
RNN	5	29956595	7.18671e-09
RNN	5	29931695	2.81886e-08
RNN	5	29842470	9.88044e-08
RNN	5	26616603	1.18137e-07
RNN	5	26616604	1.18137e-07
RNN	5	7110442	1.30001e-07
RNN	5	28471856	1.99776e-07
RNN	5	28471851	2.0728e-07
RNN	5	28471855	2.0728e-07
RNN	6	9384419	4.41302e-13
RNN	6	22481729	1.97667e-12
RNN	6	11415699	4.96978e-12
RNN	6	22481738	5.0556e-12
RNN	6	77046	1.35326e-10
RNN	6	23017215	5.77739e-08
RNN	6	19215381	1.08109e-07
RNN	6	19215395	1.14595e-07
RNN	7	8259117	3.78885e-14
RNN	7	7327438	1.96758e-12
RNN	7	9591237	2.34085e-12
RNN	7	8332502	3.61825e-12
RNN	7	8036030	2.35975e-11
RNN	7	4174564	1.04059e-10
RNN	7	8310103	5.61347e-09
RNN	7	9596196	5.19055e-08
RNN	7	6460759	1.50166e-07
RNN	7	28283115	1.78215e-07
RNN	8	28270880	1.23873e-13
RNN	8	7070034	2.6585e-12
RNN	8	6925339	3.32317e-12
RNN	8	7089185	5.04436e-09
RNN	8	10957160	2.30274e-07
RNN	9	9339124	5.91726e-12
RNN	9	8142373	1.42066e-11
RNN	9	22967069	5.69432e-08
RNN	10	5092140	1.11812e-10
RNN	10	17540654	1.09478e-09
RNN	10	5396950	1.96909e-08
RNN	10	19046870	3.46569e-08
RNN	10	3147839	9.42791e-08
RNN	11	16495420	2.55194e-12
RNN	11	16495661	3.26831e-12
RNN	11	23238005	1.028e-11
RNN	11	18766174	6.78114e-08
RNN	11	18766150	7.78602e-08
RNN	11	19817611	7.82805e-08
RNN	11	23879404	1.51076e-07
RNN	12	4793852	5.03865e-14
RNN	12	20918778	5.73419e-12
RNN	12	21378387	5.98004e-12
RNN	12	4573752	4.21815e-11
RNN	12	4573723	4.90711e-11
RNN	12	4777305	1.09545e-09
RNN	12	26804327	3.89353e-08
RNN	12	10089719	4.63067e-08
RNN	12	4246263	7.90534e-08
RNN	12	12017416	8.66721e-08
RNN	12	4793632	1.43946e-07
RNN	12	4715708	2.28234e-07
ARD	2	21407388	4.19377e-08
ARD	4	12789254	2.26784e-08
ARD	4	26886725	8.00625e-08
ARD	9	15096464	2.19822e-07
ARD	9	15096454	2.20041e-07
ARD	10	19861774	1.00872e-73
RV	1	37886209	3.80133e-22
RV	1	37886365	1.81005e-15
RV	1	37886409	1.8316e-15
RV	1	31781417	5.40765e-15
RV	1	16754252	2.68309e-14
RV	1	20681967	2.74474e-12
RV	1	20681951	1.41372e-11
RV	1	29796395	3.99992e-11
RV	1	17831023	7.00583e-11
RV	1	35339894	2.61075e-10
RV	1	29156411	3.66198e-10
RV	1	18528525	8.73981e-10
RV	1	13319557	2.87503e-09
RV	1	30046961	5.94683e-09
RV	1	35486889	8.70725e-09
RV	1	16510099	1.92504e-08
RV	1	16767253	2.61055e-08
RV	1	26912003	4.75901e-08
RV	1	17181988	5.68788e-08
RV	1	16827902	6.57482e-08
RV	2	30716371	3.77309e-15
RV	2	30716390	3.8027e-15
RV	2	16225232	4.38238e-13
RV	2	21407388	4.97214e-13
RV	2	6234701	1.78144e-11
RV	2	28142974	1.96793e-11
RV	2	6234643	2.39965e-09
RV	2	691901	1.88891e-08
RV	2	13662928	3.61107e-08
RV	2	31725051	8.21725e-08
RV	3	13430179	4.39545e-23
RV	3	34339531	8.22875e-15
RV	3	27751184	4.39184e-12
RV	3	1468300	9.34009e-12
RV	3	34356419	1.79342e-11
RV	3	34356425	1.79342e-11
RV	3	34356378	4.12257e-09
RV	3	34356429	4.15568e-09
RV	3	34356432	4.15568e-09
RV	3	16526608	2.28999e-08
RV	3	4781872	2.48483e-08
RV	3	32609986	1.11778e-07
RV	3	21402269	1.22891e-07
RV	4	10949484	1.96904e-21
RV	4	3196309	9.9428e-12
RV	4	2066092	1.4894e-11
RV	4	28160597	3.29697e-11
RV	4	28160628	3.30417e-11
RV	4	26886725	8.27348e-11
RV	4	18828090	1.91018e-10
RV	4	12789254	3.06921e-10
RV	4	14212114	3.40323e-10
RV	4	12126669	4.66165e-10
RV	4	32692854	5.19847e-09
RV	4	32692858	5.19847e-09
RV	4	32692914	5.19847e-09
RV	4	32692922	5.19847e-09
RV	4	32692855	5.28975e-09
RV	4	10982541	5.56293e-09
RV	4	35143233	6.24874e-09
RV	4	18429399	1.07531e-08
RV	4	12334200	1.74185e-08
RV	4	32505556	2.76652e-08
RV	4	21781046	3.04317e-08
RV	4	12126680	5.36203e-08
RV	5	29804690	2.50188e-23
RV	5	8547490	5.75142e-13
RV	5	29804720	2.33152e-12
RV	5	20642533	2.46079e-10
RV	5	1577382	4.24692e-09
RV	5	29374960	4.79488e-08
RV	5	11687033	7.79533e-08
RV	5	29836293	9.89621e-08
RV	5	13130225	1.12989e-07
RV	6	22872847	2.06601e-23
RV	6	22875810	1.72332e-22
RV	6	21401542	2.73218e-14
RV	6	25137177	1.03597e-13
RV	6	20810229	6.52564e-13
RV	6	14819466	2.64253e-12
RV	6	13690682	4.37125e-12
RV	6	30329236	5.18879e-12
RV	6	25137204	2.73116e-11
RV	6	20773209	1.54164e-10
RV	6	10332062	1.60059e-10
RV	6	16790708	4.09839e-09
RV	6	2576876	1.21378e-08
RV	6	15557691	1.99692e-08
RV	6	371499	5.98324e-08
RV	6	16209169	8.50719e-08
RV	6	21885607	1.38124e-07
RV	7	29611964	1.15813e-13
RV	7	26515557	3.58647e-11
RV	7	6565220	3.22539e-10
RV	7	9596379	2.22988e-09
RV	7	18860945	2.54045e-08
RV	7	18860948	2.75775e-08
RV	7	18132375	3.22624e-08
RV	7	3945313	4.4008e-08
RV	7	4756532	4.4636e-08
RV	7	201571	1.51541e-07
RV	7	4731830	2.34554e-07
RV	8	7063395	1.82839e-23
RV	8	14852502	2.09776e-23
RV	8	7032961	2.93184e-23
RV	8	10544912	4.74896e-21
RV	8	19616017	1.67549e-12
RV	8	25958079	4.05175e-12
RV	8	13089465	4.43609e-11
RV	8	6923604	5.99651e-11
RV	8	7446312	5.93181e-10
RV	8	1977906	2.34541e-09
RV	8	13827003	2.06115e-08
RV	8	13826968	2.65862e-08
RV	8	6952742	7.32534e-08
RV	9	22635279	4.06037e-17
RV	9	15096464	4.88028e-13
RV	9	15096458	5.66405e-13
RV	9	15096454	5.71965e-13
RV	9	15096477	1.30457e-12
RV	9	911347	6.39386e-10
RV	9	16201538	1.09469e-09
RV	9	1698798	1.30349e-09
RV	9	17697847	1.41641e-09
RV	9	9727794	8.03918e-09
RV	9	1698768	8.11676e-09
RV	9	22939953	2.81325e-08
RV	9	14722502	2.91935e-08
RV	9	8413030	5.71486e-08
RV	9	16201486	1.49384e-07
RV	9	34653	1.56744e-07
RV	10	5085250	5.19818e-23
RV	10	19418611	1.6614e-14
RV	10	21705001	1.76984e-14
RV	10	5085254	1.46102e-11
RV	10	3366633	4.32082e-11
RV	10	21602219	8.46998e-11
RV	10	5398920	3.82546e-09
RV	10	1217866	9.15017e-09
RV	10	10276989	1.04431e-08
RV	10	3204802	3.56127e-08
RV	11	18766142	7.75986e-24
RV	11	15042774	3.2158e-11
RV	11	16350032	7.6601e-10
RV	11	13443010	1.30164e-07
RV	11	3000423	1.32389e-07
RV	11	22588884	1.87e-07
RV	12	17877191	1.98358e-23
RV	12	6295540	8.04175e-16
RV	12	10569545	5.39609e-13
RV	12	11987701	6.4184e-10
RV	12	2184246	3.76288e-08
RV	12	13943404	4.06149e-08
RV	12	7960967	6.27251e-08
RV	12	6114540	1.44756e-07
RV	12	11987744	1.7145e-07
RV	12	22271823	1.72214e-07
RL	1	15395867	3.76353e-12
RL	1	19932351	1.96401e-11
RL	1	16754221	8.73871e-11
RL	1	18357746	1.40358e-10
RL	1	18357810	1.40593e-10
RL	1	16783509	1.25198e-09
RL	1	18261700	4.16475e-09
RL	1	18604303	4.74422e-09
RL	1	16754252	6.91975e-09
RL	1	1777809	8.74609e-09
RL	1	15194397	1.23308e-08
RL	1	15194358	1.23308e-08
RL	1	15141997	1.69504e-08
RL	1	11838798	3.98394e-08
RL	1	27571916	1.07446e-07
RL	1	15128958	1.42699e-07
RL	2	23352008	1.09648e-11
RL	2	13658888	1.54413e-08
RL	2	15863890	1.83894e-08
RL	2	15863938	2.17986e-08
RL	2	27890779	3.35806e-08
RL	2	32491137	5.95538e-08
RL	3	565167	2.3504e-12
RL	3	565174	3.4247e-12
RL	3	565162	5.85501e-12
RL	3	35590931	6.04658e-12
RL	3	35590963	1.12211e-11
RL	3	18173978	1.35257e-11
RL	3	11377549	3.76416e-11
RL	3	565155	4.09307e-09
RL	3	14104705	5.24709e-09
RL	3	14104700	1.1665e-08
RL	3	4620593	2.30736e-07
RL	4	22700330	3.16326e-12
RL	4	6036008	3.06461e-11
RL	4	2905124	7.63268e-11
RL	4	26873369	1.19972e-10
RL	4	10109288	8.6316e-09
RL	4	14117314	9.81218e-09
RL	4	26892666	1.62738e-08
RL	4	29918449	5.14386e-08
RL	4	6357509	2.31924e-07
RL	5	6117514	9.85146e-15
RL	5	6117508	1.07236e-14
RL	5	29956584	8.62177e-11
RL	5	6117754	2.33124e-10
RL	5	9707359	5.29986e-09
RL	5	7110442	3.31856e-08
RL	5	29956595	6.60146e-08
RL	5	29842470	1.00795e-07
RL	6	9384419	1.24147e-12
RL	6	22481729	8.25691e-12
RL	6	22481738	1.51323e-11
RL	6	11415699	9.61315e-10
RL	6	23017215	4.06664e-08
RL	6	77046	4.16688e-08
RL	7	8259117	3.46559e-14
RL	7	7327438	1.82411e-12
RL	7	8332502	5.07659e-12
RL	7	9591237	9.70134e-12
RL	7	8036030	3.22127e-11
RL	7	4174564	1.05496e-10
RL	7	8310103	1.65502e-08
RL	7	6460759	1.92852e-08
RL	7	8259178	2.05979e-07
RL	8	28270880	4.23252e-12
RL	8	6925339	7.59851e-12
RL	8	7070034	1.09345e-11
RL	8	7089185	1.01199e-08
RL	9	8142373	1.16218e-11
RL	9	9339124	1.44848e-11
RL	9	22967069	2.38036e-07
RL	10	5092140	2.34651e-10
RL	10	17540654	7.39239e-10
RL	10	19046870	1.74988e-08
RL	11	16495661	2.07055e-12
RL	11	16495420	2.19275e-12
RL	11	23238005	1.83251e-11
RL	12	4793852	1.67001e-12
RL	12	21378387	9.23035e-12
RL	12	20918778	1.6896e-11
RL	12	4573752	7.75835e-11
RL	12	4573723	1.0595e-10
RL	12	4777305	2.2984e-09
RL	12	4793632	1.82996e-08
RL	12	10120036	3.74153e-08
RL	12	20918825	9.07223e-08
RL	12	4246263	1.26849e-07

## Sheet: GEMMA
Significant loci for genome-wide association analysis of GEMMA
Traits	Chr	Position	p
PH	1	32712980	7.14321e-07
PFW	8	21432370	1.11695e-07
PDW	8	21432370	4.10633e-08
RBN	5	6117508	2.9858e-09
RBN	5	6117514	4.74307e-09
RBN	8	20116506	7.4349e-07
RBN	10	3366842	7.87234e-07
RFDN	8	21426424	8.76036e-08
RFDN	10	18527662	9.47094e-07
RN	1	27650944	2.41996e-07
RN	1	27650898	6.88942e-07
RN	1	28670500	8.05392e-07
RN	1	28670502	8.05392e-07
RN	1	28670512	8.05392e-07
RN	2	23286096	9.70525e-07
RN	5	6117514	4.4232e-11
RN	5	6117508	6.00821e-11
RN	5	11068362	6.11864e-07
RN	6	20939316	6.46576e-07
RN	7	19939610	2.46831e-07
RN	10	7175672	3.7203e-07
RN	10	3366842	6.12799e-07
RN	10	16062902	8.14212e-07
RN	12	3624280	6.84156e-07
RNN	1	27650944	2.53611e-07
RNN	1	27650898	6.52056e-07
RNN	1	27856592	8.17573e-07
RNN	1	27635965	8.39537e-07
RNN	1	27635908	8.495e-07
RNN	1	28670500	8.99311e-07
RNN	1	28670502	8.99311e-07
RNN	1	28670512	8.99311e-07
RNN	1	27650922	9.50651e-07
RNN	3	17522504	9.54038e-07
RNN	4	13601546	6.89472e-07
RNN	5	6117514	1.53905e-12
RNN	5	6117508	2.92772e-12
RNN	5	11068362	1.49621e-07
RNN	5	10709395	8.46884e-07
RNN	5	10709389	9.05633e-07
RNN	6	20939316	2.00819e-07
RNN	10	3366842	7.28107e-07
RL	2	35096665	7.78846e-07
RL	5	6117514	4.51093e-12
RL	5	6117508	2.09382e-11
RL	5	10709389	1.49919e-07
RL	5	11068362	3.12008e-07
RL	5	10709395	3.68456e-07
RL	12	7928922	1.01689e-07

## Sheet: mrMLM
mrMLM final result
Trait name	Chromosome	Marker position (bp)	LOD score	'-log10(P)'
PH	1	32712980	9.627	10.5574
PH	1	39213471	6.8147	7.6737
PH	1	11142042	8.6831	9.592
PH	1	30259098	6.2365	7.0774
PH	2	25712306	5.7116	6.5346
PH	2	32816050	3.9156	4.6629
PH	2	5440794	5.9818	6.8142
PH	3	4623234	9.6815	10.613
PH	3	14666789	5.3893	6.2006
PH	3	22128396	6.2062	7.0461
PH	3	30372158	3.733	4.4709
PH	4	5198195	4.6352	5.4161
PH	4	17596055	3.3088	4.0231
PH	4	29918185	6.8034	7.6621
PH	5	29844182	8.9274	9.8421
PH	5	24439364	6.525	7.3751
PH	5	12503181	4.2717	5.0363
PH	6	6539510	5.7095	6.5324
PH	6	11315882	13.0611	14.0552
PH	7	10602364	4.2103	4.972
PH	7	28034089	7.9621	8.8531
PH	8	5014612	6.9043	7.766
PH	8	18424656	3.4241	4.1451
PH	9	8007695	9.3306	10.2545
PH	9	10540494	5.8476	6.6754
PH	9	2573293	5.5753	6.3934
PH	10	14691755	3.6194	4.3512
PH	10	16557218	3.9874	4.7383
PH	11	3684187	6.2705	7.1125
PH	11	19856214	9.0986	10.0172
PH	11	11380472	5.2581	6.0644
PH	12	7148894	7.6642	8.5474
PFW	3	7950780	13.4919	14.4928
PFW	4	12083374	3.1685	3.8743
PFW	4	3871101	3.0629	3.7622
PFW	6	19197471	4.2854	5.0507
PFW	6	10625497	3.7895	4.5304
PFW	9	5494000	3.3859	4.1047
PFW	11	25791807	5.8117	6.6382
PFW	12	12026194	3.5462	4.274
RSA	1	2539797	3.6111	4.3425
RSA	2	5678731	8.6508	9.559
RSA	2	10446741	4.475	5.2489
RSA	3	12080647	5.3512	6.161
RSA	3	17522504	4.0717	4.8268
RSA	4	33699298	7.2861	8.1589
RSA	4	20135591	3.3432	4.0595
RSA	4	2742875	3.9729	4.7231
RSA	4	15455313	7.7966	8.6833
RSA	4	3073477	3.8648	4.6096
RSA	5	19857178	4.125	4.8827
RSA	5	16691641	5.1559	5.9582
RSA	5	9991936	7.4123	8.2886
RSA	6	17640731	5.35	6.1598
RSA	6	10625497	4.4049	5.1756
RSA	6	18690873	4.8166	5.6052
RSA	7	3119214	10.767	11.7207
RSA	7	8633480	4.3422	5.1101
RSA	8	7238794	8.0755	8.9694
RSA	9	1698798	6.8772	7.7381
RSA	9	6141639	7.5584	8.4387
RSA	9	5726539	4.9406	5.7343
RSA	10	3239325	5.3047	6.1128
RSA	10	20440780	3.2784	3.9909
RSA	10	4902765	6.2751	7.1173
RSA	11	7473600	6.5728	7.4244
RSA	11	5513201	9.4079	10.3335
RSA	11	13601337	3.7303	4.4681
RSA	11	26626622	4.5743	5.3526
RSA	11	28957285	3.5495	4.2775
RSA	12	23701342	4.7162	5.5006
RSA	12	26810795	7.0621	7.9284
RSA	12	8836500	4.1016	4.8581
RBN	1	16783509	5.1773	5.9804
RBN	1	12951213	7.6686	8.5519
RBN	1	25684596	5.6628	6.4841
RBN	1	35280776	4.68	5.4628
RBN	1	34052793	8.9823	9.8983
RBN	1	28899594	7.5341	8.4137
RBN	2	27923275	5.9702	6.8022
RBN	2	9805848	4.1097	4.8666
RBN	2	20568523	5.5532	6.3705
RBN	3	25444612	3.7632	4.5027
RBN	3	11966048	9.2387	10.1605
RBN	3	4813231	10.5191	11.4679
RBN	4	6947607	5.1079	5.9083
RBN	4	1886914	4.2415	5.0047
RBN	4	9517028	3.6392	4.3721
RBN	5	15232484	5.434	6.2469
RBN	6	77046	16.4927	17.536
RBN	6	13679196	9.8582	10.7935
RBN	7	22290954	7.2427	8.1142
RBN	7	9799583	6.9131	7.7751
RBN	7	18192365	3.0184	3.7148
RBN	7	3119214	4.6258	5.4063
RBN	7	15761630	4.163	4.9225
RBN	8	7292710	5.8863	6.7154
RBN	10	887460	6.496	7.3452
RBN	10	5133069	4.1661	4.9257
RBN	10	7152577	5.2104	6.0148
RBN	10	8024129	3.6889	4.4245
RBN	11	26471293	6.3414	7.1857
RBN	12	23344286	4.2951	5.0608
RBN	12	11694238	15.1932	16.2191
RBN	12	10564343	5.3383	6.1476
RBN	12	10459737	4.9081	5.7005
RN	1	25380135	5.5614	6.379
RN	1	16783509	4.1638	4.9233
RN	2	21878821	4.7174	5.5018
RN	3	13432574	3.1503	3.855
RN	3	2289433	3.7976	4.5389
RN	4	6947607	3.1647	3.8703
RN	4	26133817	4.2191	4.9812
RN	4	3720612	4.3468	5.1149
RN	4	16756598	6.0881	6.9241
RN	4	3905919	5.5424	6.3593
RN	5	6117508	17.5654	18.622
RN	5	19863871	4.3224	5.0894
RN	7	19802147	3.6795	4.4146
RN	7	11046874	4.3797	5.1493
RN	7	9876351	4.9783	5.7736
RN	7	11488667	6.5787	7.4305
RN	8	14607355	5.9088	6.7387
RN	8	13083261	3.8312	4.5742
RN	8	19458260	4.6412	5.4224
RN	8	9744070	5.9702	6.8022
RN	8	13708688	4.1746	4.9346
RN	9	1698768	6.7621	7.6195
RN	9	7306265	5.534	6.3506
RN	10	3366842	5.8206	6.6475
RN	10	15673492	5.1619	5.9644
RN	10	8857188	3.2367	3.9467
RN	10	10048266	5.1945	5.9983
RN	10	14308730	3.7904	4.5313
RN	12	22132406	4.8934	5.6852
RN	12	20393800	7.2968	8.1699
NRN	1	28899594	28.1265	29.283
NRN	1	16783509	10.9222	11.8789
NRN	1	25684596	3.5552	4.2835
NRN	1	5154439	6.2158	7.056
NRN	2	6965701	4.9884	5.7841
NRN	2	1666382	3.3231	4.0382
NRN	3	24591694	4.9508	5.7449
NRN	3	23327359	3.1331	3.8368
NRN	4	6947607	3.0945	3.7958
NRN	4	26133817	4.0525	4.8066
NRN	4	6240218	3.1364	3.8403
NRN	4	3720612	4.3511	5.1194
NRN	4	12083374	3.2869	3.9999
NRN	4	24817890	3.1869	3.8939
NRN	6	77046	9.6784	10.6099
NRN	7	11046874	4.4763	5.2502
NRN	7	8975897	6.3588	7.2037
NRN	7	11488667	3.666	4.4004
NRN	9	22596142	5.4503	6.2638
NRN	9	230061	5.2677	6.0743
NRN	10	3366842	3.2184	3.9273
NRN	10	16897289	3.1393	3.8433
NRN	11	9405645	5.1745	5.9775
NRN	12	17112155	4.4868	5.2612
RV	1	16757754	3.3311	4.0467
RV	3	18173985	3.3332	4.0489
RV	6	16790883	7.7328	8.6178
RV	7	8633480	4.0659	4.8207
RV	9	4867854	4.3756	5.145
RV	11	18204294	3.8589	4.6034
RV	12	10369960	4.365	5.1339
RL	1	28899405	21.1228	22.2184
RL	1	29684846	3.4426	4.1646
RL	1	8116873	4.3911	5.1612
RL	2	2993706	3.2539	3.9649
RL	3	13482198	4.3363	5.1039
RL	3	2973024	4.3006	5.0666
RL	3	13432574	4.9629	5.7575
RL	4	7784691	4.3738	5.1431
RL	4	1600535	3.2451	3.9556
RL	5	6117514	9.4515	10.378
RL	5	6329597	4.9996	5.7957
RL	5	13126238	5.3698	6.1803
RL	5	9991936	4.5276	5.3038
RL	6	56512	13.7613	14.7664
RL	7	11046874	3.6581	4.392
RL	7	18277294	3.6237	4.3558
RL	7	16164897	4.1074	4.8642
RL	7	17032136	4.7422	5.5277
RL	8	12804292	3.0766	3.7767
RL	9	6767799	5.4094	6.2214
RL	9	5746822	4.0099	4.762
RL	10	15673490	4.7038	5.4877
RL	10	21200842	3.4788	4.2029
RL	11	23782504	3.8296	4.5726
RL	11	15098156	4.7967	5.5845
RL	12	23344286	4.192	4.9529

## Sheet: 3VmrMLM
3VmrMLM final result
Trait name	Chromosome	Position (bp)	LOD	add	dom	variance	P-value
PH	1	5680910	25.1805	0.9351	0.9747	0.1623	6.61341e-26
PH	1	13058507	20.4296	-0.2354	-0.9433	0.1388	3.7251e-21
PH	1	18293750	13.6393	-0.9029	0.4997	0.213	2.29731e-14
PH	1	28713021	33.6802	-1.2394	-0.8781	0.2632	2.09438e-34
PH	1	32049377	15.7863	-0.7475	0.1637	0.3857	1.63792e-16
PH	1	33441505	23.9098	0.9026	-1.0177	0.3273	1.23329e-24
PH	1	41140798	14.2596	-0.7289	0.0938	0.4407	5.50669e-15
PH	1	42176915	27.1549	1.02	0.6128	0.0827	7.01635e-28
PH	2	209212	8.2875	0.4717	1.1561	0.1859	5.16144e-09
PH	2	7906946	11.26	0.2374	-6.5207	0.3957	5.50093e-12
PH	2	29485766	10.727	-0.5876	0.4965	0.287	1.87686e-11
PH	4	5342007	10.3013	0.5777		0.1891	5.67895e-12
PH	4	9477135	30.911	1.2462	-0.0274	0.3578	1.23054e-31
PH	4	10440623	27.2956	-1.0817	0.0784	0.2612	5.07495e-28
PH	4	13787857	6.1863	-0.0031	-1.5726	0.19	6.51587e-07
PH	4	17076885	26.9795	-0.6331	-1.4911	0.1799	1.05076e-27
PH	5	570371	14.0567	0.682	0.0158	0.1818	8.78754e-15
PH	5	3907092	34.3483	-1.2522	0.0292	0.2983	4.497e-35
PH	5	12974248	7.5128	-0.4819		0.1176	4.05669e-09
PH	5	21961882	6.123	-0.428	-0.4689	0.1827	7.53732e-07
PH	6	4831000	8.3561	0.5386	-0.1605	0.2472	4.40767e-09
PH	6	6838588	8.2879	-0.1772	4.3682	0.2726	5.157e-09
PH	7	13945742	11.285	-0.1903	1.5936	0.396	5.19329e-12
PH	8	2445564	28.3933	1.0496	-0.0068	0.1184	4.05265e-29
PH	8	5804523	11.6815	0.0933	4.3388	0.355	2.08419e-12
PH	8	6375150	10.3487	-0.5231	0.6876	0.3354	4.48404e-11
PH	8	8092950	16.6287	0.7346		0.2312	2.11981e-18
PH	8	13452717	29.5283	-1.1084	0.0218	0.3483	2.97034e-30
PH	8	15303458	9.4075	0.5447		0.1107	4.64436e-11
PH	8	26405592	6.5432	0.4356	0.6215	0.1874	2.86424e-07
PH	9	563867	5.1684	0.1068	1.2097	0.1104	6.78909e-06
PH	9	2196828	5.0688	0.3387	-0.5775	0.129	8.5381e-06
PH	9	4718039	18.2238	0.8871	-0.012	0.1583	5.98219e-19
PH	11	3684187	8.4255	0.5188	0.3598	0.1449	3.75717e-09
PH	12	11636211	17.733	0.8363	0.245	0.0952	1.85203e-18
PH	12	12183857	10.1347	0.6766	0.1681	0.0823	7.339e-11
PH	12	21125918	23.1195	0.9378		0.3686	5.83093e-25
PH	12	25144702	9.0863	-0.0918	2.7663	0.2854	8.20457e-10
PFW	1	12517038	8.3172	0.0034	0.07	0	4.82014e-09
PFW	1	16171234	4.3248	-0.0017	0.0143	0	4.73597e-05
PFW	1	20858917	18.6228	0.001	0.0115	0	2.38721e-19
PFW	1	30298138	8.2093	-0.0017	0.0545	0	6.18076e-09
PFW	1	37886209	37.4597	-0.0012	0.26	0.0002	3.48045e-38
PFW	2	471781	13.3852	0.0074	-0.0038	0	4.12419e-14
PFW	2	18666861	13.9471	0.0077	-0.0045	0	1.1309e-14
PFW	3	17592815	10.803	-0.0076	0.0231	0.0001	1.57542e-11
PFW	5	20584035	14.521	-0.0092	-0.0078	0.0001	3.01641e-15
PFW	7	14068151	15.5241	-0.0024	-0.0122	0	2.99586e-16
PFW	8	13802771	21.6909	-0.0103	-0.0027	0	2.04121e-22
PFW	9	13119	4.6876	0.0023	0.019	0	2.05378e-05
PFW	9	5359000	7.1891	0.0051		0	8.72801e-09
PFW	9	6141639	13.2815	0.0081	0.005	0	5.23557e-14
PFW	9	9220904	5.5782	-0.0025	0.0309	0	2.64237e-06
PFW	10	334304	13.3606	0.0079	0.003	0	4.36396e-14
PFW	10	6580094	10.8323	0.0031	0.1219	0.0001	1.47263e-11
PFW	10	7102926	11.5425	0.0018	0.075	0	2.87062e-12
PFW	10	17539058	4.7938	0.0003	0.0346	0	1.60835e-05
PFW	11	3327954	8.3015	0.0057	-0.0009	0	4.99778e-09
PFW	12	4311959	6.4622	0.0011	0.0252	0	3.45166e-07
PFW	12	15675671	36.0954	-0.0019	0.0137	0	8.0525e-37
PFW	12	23324836	11.5351	0.0064	-0.0093	0	2.91989e-12
PDW	1	20098271	30.4177	-0.0015	-0.0032	0	3.83218e-31
PDW	1	37886209	53.1756	0.0001	0.053	0	6.7048e-54
PDW	2	7864448	12.0223	-0.0012	-0.0005	0	9.50933e-13
PDW	2	15786986	3.9643	-0.0008	0	0	0.000108598
PDW	3	3807546	9.9524	-0.0004	0.0083	0	1.11683e-10
PDW	3	12887728	6.3145	-0.0006	0.0076	0	4.84969e-07
PDW	3	18950846	9.3591	0.0003	0.0025	0	4.37767e-10
PDW	5	3515857	14.1856	-0.0006	0.0224	0	6.53073e-15
PDW	6	17841138	9.7573	0.0007	0.0112	0	1.74992e-10
PDW	7	4088559	9.3457	0.001	0.0013	0	4.51473e-10
PDW	7	12161924	5.649	0	0.0061	0	2.24489e-06
PDW	7	15596453	4.9931	-0.0002	0.0095	0	1.01654e-05
PDW	8	13802771	26.6456	-0.0019	-0.0006	0	2.26669e-27
PDW	8	15453560	8.4658	0.0005	0.0096	0	3.42366e-09
PDW	8	17056802	4.3739	-0.0002	0.0031	0	4.2289e-05
PDW	8	20161779	5.6743	0.0003	0.0099	0	2.11799e-06
PDW	9	9220904	5.837	-0.0006	0.0044	0	1.45602e-06
PDW	9	9517970	3.1156	0	0.0078	0	0.000766458
PDW	10	6580094	36.7914	0.0007	0.0406	0	1.62165e-37
PDW	10	7102926	9.0198	-0.0002	0.0108	0	9.56063e-10
PDW	12	14478601	12.1177	-0.0003	0.0097	0	7.63466e-13
PDW	12	15675671	46.5953	-0.0005	0.0026	0	2.54945e-47
PDW	12	23753802	6.7869	-0.0007	0.0018	0	1.63421e-07
RSA	1	32347347	8.5711	-0.001	6.2144	0.2558	2.68669e-09
RSA	1	37886209	31.6486	-0.0267	18.0292	1.0342	2.25184e-32
RSA	2	15787019	26.209	-0.8891	-0.1881	0.1286	6.19327e-27
RSA	2	17822242	13.6163	0.0911	0.6989	0.0893	2.42239e-14
RSA	3	27303502	6.1454	-0.0794	5.1376	0.1851	7.15813e-07
RSA	4	21413073	7.1425	-0.5375	-0.0093	0.0504	7.20782e-08
RSA	4	27615903	4.1329	0.1747	3.7278	0.1174	7.36597e-05
RSA	5	16304402	19.3795	0.2652	0.8285	0.0799	4.18076e-20
RSA	6	22236424	6.5092	-0.3831	0.1404	0.1236	3.09761e-07
RSA	7	8618670	5.3099	-0.0864	4.7088	0.1315	4.90064e-06
RSA	7	11319715	3.1073	-0.1556	2.2684	0.0875	0.000781253
RSA	7	22830491	13.0558	0.5342	-0.6584	0.2299	8.80478e-14
RSA	9	2537845	8.4806	0.2476	4.1405	0.1537	3.3092e-09
RSA	10	6580094	7.5859	0.1979	7.7253	0.28	2.5964e-08
RSA	10	12656275	9.0126	-0.563	0.3188	0.0653	9.72135e-10
RSA	11	1797045	15.4506	-0.4986	1.8035	0.2822	3.54755e-16
RSA	12	25696421	5.996	-0.4143	0.1963	0.0314	1.00969e-06
RBN	1	27397158	4.6737	-3.6427	83.1499	65.5526	2.12074e-05
RBN	1	41396400	28.5063	-19.5295	-10.119	36.3755	3.12448e-29
RBN	3	3572506	6.9871	-5.9177	113.82	46.9535	1.03085e-07
RBN	3	16650045	5.4577	2.032	37.8984	52.1796	3.48724e-06
RBN	4	6947607	5.4935	-8.2916	1.9538	20.7421	3.21168e-06
RBN	4	15148592	16.3883	2.7718	248.672	270.769	4.09571e-17
RBN	5	14801208	6.4724	-3.1012	57.9141	59.017	3.37201e-07
RBN	5	15232484	4.6224	6.3514		30.0607	3.95553e-06
RBN	5	21180149	7.0242	7.2979	-15.3265	58.4652	9.46474e-08
RBN	6	13679196	18.0707	-17.9022	-15.4477	154.514	8.51158e-19
RBN	6	17841138	4.6905	0.7072	91.8936	56.8691	2.04007e-05
RBN	7	7260062	6.5433	1.9866	107.449	96.8385	2.86364e-07
RBN	7	22607327	11.1898	-10.5584		45.8641	7.0551e-13
RBN	8	14774105	5.867	7.2729	-16.5119	52.687	1.35888e-06
RBN	8	19360885	7.5054	-4.252	105.681	85.0694	3.12543e-08
RBN	10	13421732	16.9939	13.8786	7.8974	18.905	1.01567e-17
RBN	11	8973968	9.7045	-10.6758	0.2227	85.8345	1.97649e-10
RBN	11	15520675	16.7726	-12.6065	-7.6483	33.3149	1.69033e-17
RBN	11	21305891	9.819	9.3694		34.39	1.76421e-11
RBN	11	26471293	5.8461	7.1863	-7.9444	47.9705	1.42601e-06
RBN	12	4793852	16.3556	-2.1129	176.494	252.634	4.4162e-17
RBN	12	13428465	12.8597	-13.3191	-5.0242	23.7151	1.38271e-13
RFD	1	12466647	11.0595	-0.0105	0.003	0.0001	8.72776e-12
RFD	1	16913629	4.2626	-0.0004	0.0329	0	5.4647e-05
RFD	1	17181977	5.2126	-0.0032	0.0334	0	6.13134e-06
RFD	1	25670148	3.8445	-0.0021	0.0134	0	0.000143095
RFD	1	29700280	8.8361	-0.0085	-0.0001	0	1.45968e-09
RFD	2	2366207	7.8167	-0.0051	0.0196	0	1.52614e-08
RFD	2	3602194	5.8493	-0.0112	0.0002	0	1.41565e-06
RFD	3	16474350	10.0297	-0.0015	-0.0122	0	9.34648e-11
RFD	3	17326375	13.4805	0.012	-0.008	0.0001	3.31141e-14
RFD	3	26443094	9.8531	-0.0005	0.0277	0.0001	1.40361e-10
RFD	4	64651	12.08	-0.0021	-0.0179	0	8.32609e-13
RFD	4	8849630	33.8647	0.0107	0.0313	0.0001	1.36943e-34
RFD	4	10493658	26.2981	-0.0149	-0.004	0.0001	5.04565e-27
RFD	6	131337	4.1921	-0.0013	0.0127	0	6.427e-05
RFD	6	6516984	11.3925	-0.0077		0	4.38564e-13
RFD	6	6996188	4.5191	-0.0041	0.0106	0	3.02718e-05
RFD	6	8616153	5.7975	-0.0019	0.0375	0.0001	1.59469e-06
RFD	6	18640749	9.1966	-0.0124	0.0011	0	6.36485e-10
RFD	6	27543968	11.3113	-0.0031	0.0326	0.0001	4.88796e-12
RFD	6	30660534	10.8652	-0.0083	-0.0009	0	1.36515e-11
RFD	7	20995525	7.7394	0.0004	0.0145	0	1.82332e-08
RFD	8	16081208	18.4663	0.011	0.0038	0	3.42246e-19
RFD	9	3387822	7.564	-0.0076	-0.001	0	2.73055e-08
RFD	9	4294565	4.7565	0.0028	-0.0203	0	1.75265e-05
RFD	10	16107677	10.7665	0.0074	-0.0097	0	1.71366e-11
RFD	10	21877065	6.9049	0.0016	-0.0211	0	1.24552e-07
RFD	11	5906301	6.2004	-0.0055		0	9.11672e-08
RFD	11	18402191	3.8098	-0.006	0.0077	0	0.000155021
RFD	12	251530	9.2596	-0.0068		0	6.5792e-11
RFD	12	4319200	11.546	0.0032	0.0318	0.0001	2.8474e-12
RN	1	22182699	6.8057	6.0094	211.284	282.99	1.56508e-07
RN	2	6965701	25.6029	-31.9399	-30.5829	322.731	2.50035e-26
RN	2	17139438	16.465	-22.6877	128.517	496.789	3.43248e-17
RN	3	3572506	25.8576	-29.8624	319.599	537.069	1.39098e-26
RN	3	18618984	6.2545	1.9817	213.616	310.346	5.5688e-07
RN	4	6362494	7.4495	3.2593	231.83	345.266	3.5546e-08
RN	4	6947607	6.9123	-18.8199	-1.6139	80.7172	1.22445e-07
RN	5	9707359	7.4906	3.0967	54.0762	234.136	3.23355e-08
RN	5	13967485	13.4945	-24.5674	-39.9027	297.387	3.2059e-14
RN	5	29185094	16.3282	-27.222	-32.147	380.644	4.70322e-17
RN	6	7312047	7.353	-21.2111	62.6459	197.633	4.43867e-08
RN	6	8986351	6.9849	6.8422	210.439	269.312	1.03593e-07
RN	6	13679196	14.4706	-31.8918	-7.3132	491.356	3.38802e-15
RN	6	23017215	6.9058	-22.1817	-4.3733	103.657	1.24284e-07
RN	7	8259117	16.8999	-2.7398	362.674	1018.99	1.26105e-17
RN	7	10706176	5.3312	-17.7321	-4.76	148.783	4.66672e-06
RN	7	29441350	17.3515	-45.1528	12.6537	653.066	4.45787e-18
RN	8	6054931	5.249	18.4099	-16.7733	97.1534	5.6395e-06
RN	10	9843333	5.6588	4.4396	-111.989	199.521	2.19495e-06
RN	10	20076653	25.3158	-36.0621	10.794	795.339	4.84377e-26
NRN	1	16404151	5.2525	-8.4153	228.126	1332.1	5.59348e-06
NRN	1	22182699	8.1431	-6.0051	503.627	1610.14	7.19856e-09
NRN	2	6965701	19.96	-56.8263	-66.0088	1034.03	1.09839e-20
NRN	2	30089307	8.3025	7.4591	507.599	2020.02	4.98701e-09
NRN	2	33816772	7.2523	-33.8212	-26.7746	1086.67	5.59714e-08
NRN	3	3572506	14.3551	-33.3229	736.779	1864.89	4.41997e-15
NRN	4	6362494	6.0813	-5.7167	431.82	1231.46	8.29712e-07
NRN	4	6947607	7.3932	-39.9741	12.7181	518.591	4.04608e-08
NRN	4	15148592	11.1474	3.5969	848.166	3175.22	7.1283e-12
NRN	5	9707359	3.3289	-6.3254	72.2414	552.355	0.000469043
NRN	5	11068362	35.5564	-80.7144	-52.7718	2499.92	2.78555e-36
NRN	5	14801208	4.194	-5.7205	203.759	681.287	6.40006e-05
NRN	6	7312047	6.297	-41.5459	97.5645	620.382	5.04965e-07
NRN	6	13679196	13.9175	-63.4646	-172.618	2014.17	1.21059e-14
NRN	7	8259117	16.923	-5.7059	749.79	4355.84	1.19566e-17
NRN	7	10706176	12.905	-55.79	-25.8608	1437.59	1.24593e-13
NRN	7	29441094	18.6984	-74.986	42.164	2640.55	2.00593e-19
NRN	8	19360885	6.0762	-17.8685	379.601	1135.32	8.39592e-07
NRN	10	9843333	3.3294	2.4989	-184.38	496.383	0.000468549
NRN	10	20076653	29.5611	-80.6715	122.168	4203	2.75425e-30
NRN	11	23782504	5.5568	-33.4201	13.8345	319.099	2.77583e-06
ARD	1	28737420	11.3395	0.0022	0.0896	0.0001	4.58069e-12
ARD	2	22189422	10.6655	-0.0124	0.0056	0	2.1623e-11
ARD	3	239264	8.0597	-0.0073	0.0434	0.0001	8.72211e-09
ARD	3	7037317	5.7333	0.011	0.0022	0	1.84871e-06
ARD	3	13385311	4.517	0.0015	-0.0267	0.0001	3.0419e-05
ARD	3	23073202	8.7644	-0.0026	0.1918	0.0002	1.72139e-09
ARD	3	35510889	3.9822	-0.0032	0.0365	0.0001	0.000104207
ARD	4	676451	16.9804	0.0056	0.2628	0.0003	1.04762e-17
ARD	4	7767979	10.6467	0.0138	0.0022	0	2.25806e-11
ARD	4	9094572	11.3	-0.011		0.0001	5.4475e-13
ARD	4	21066986	8.4411	0.0009	0.1909	0.0001	3.62449e-09
ARD	4	28629731	50.8554	-0.0281	-0.0104	0.0001	1.40113e-51
ARD	5	2406140	19.9628	0.0157	-0.0083	0.0001	1.09117e-20
ARD	5	8335176	15.8879	-0.0155	-0.0013	0.0001	1.29614e-16
ARD	5	18246085	6.1136	0.0001	0.0661	0.0001	7.70249e-07
ARD	5	23418437	4.2419	-0.0006	0.0545	0	5.73124e-05
ARD	6	10669609	11.4342	-0.0138	-0.0022	0.0001	3.68316e-12
ARD	7	201571	9.4467	-0.0018	0.0666	0.0001	3.5783e-10
ARD	7	1612418	5.4435	0.0025	-0.0457	0.0001	3.6029e-06
ARD	7	13963816	5.6925	0.0009	-0.0311	0.0001	2.03118e-06
ARD	8	8744055	7.0473	-0.011	0.0047	0.0001	8.97433e-08
ARD	8	10544912	8.16	-0.0102	0.1084	0.0001	6.92259e-09
ARD	8	10726310	6.307	0.0031	0.1086	0.0001	4.93476e-07
ARD	8	15046551	4.3909	-0.0019	0.0315	0.0001	4.06659e-05
ARD	8	21764806	36.1757	-0.0247	-0.0025	0.0001	6.69328e-37
ARD	10	17191814	5.7399	-0.0085	0.0273	0.0001	1.82094e-06
ARD	10	20102195	12.3996	-0.0121	0.0095	0.0001	3.98929e-13
ARD	11	16593054	24.3025	-0.0181	-0.0054	0	4.99295e-25
ARD	12	4646109	5.2296	-0.0014	0.0265	0.0001	5.89705e-06
ARD	12	11989715	4.3338	-0.0005	0.0303	0.0001	4.63847e-05
ARD	12	16681813	12.1434	-0.0142	-0.0001	0.0001	7.19496e-13
RV	1	12466462	4.181	0.0014	0.0604	0.0002	6.59461e-05
RV	1	16827902	9.1249	0.0044	0.1253	0.0003	7.50639e-10
RV	1	18357810	14.8622	0	0.2207	0.0005	1.37519e-15
RV	1	24916133	16.0208	0.0285	-0.0073	0.0001	9.54554e-17
RV	1	32347347	7.8491	-0.0054	0.2122	0.0003	1.4164e-08
RV	2	17822242	7.0509	-0.025	0.0022	0.0002	8.89954e-08
RV	2	30089307	24.927	-0.0039	0.4137	0.0013	1.18567e-25
RV	4	3689072	7.8082	-0.0011	0.1107	0.0004	1.55635e-08
RV	4	16086539	6.9099	-0.0165	0.0255	0.0001	1.23136e-07
RV	4	17151051	17.0452	0.0058	0.234	0.001	9.0252e-18
RV	4	17601162	15.394	-0.0264	-0.049	0.0001	4.04139e-16
RV	4	27615903	7.4533	0.0075	0.1976	0.0003	3.52369e-08
RV	6	16726220	8.0423	-0.0034	0.1284	0.0005	9.07717e-09
RV	7	13208431	10.19	0.0047	-0.1328	0.0004	6.46169e-11
RV	7	19704657	5.6237	-0.0106	0.0199	0.0002	2.37987e-06
RV	8	5822976	7.9122	-0.0194	-0.0099	0.0001	1.22482e-08
RV	8	6514818	10.2677	-0.0223	0.0082	0.0002	5.403e-11
RV	8	9892118	7.173	-0.0012	-0.0254	0.0001	6.71788e-08
RV	9	6141639	17.1594	0.0284	-0.0021	0.0002	6.93758e-18
RV	9	8088897	11.001	0.0027	0.0706	0.0005	9.98578e-12
RV	9	13529881	5.3371	-0.0037	0.1116	0.0002	4.60323e-06
RV	9	18111650	8.9339	-0.0092	0.1016	0.0004	1.16535e-09
RV	9	20294409	8.6029	0.0029	0.0901	0.0002	2.49673e-09
RV	10	2308623	9.2111	-0.0212	0.0071	0.0001	6.15583e-10
RV	10	6580094	14.8885	-0.0039	0.4381	0.0009	1.29442e-15
RV	11	6402098	22.5966	0.0289	-0.0209	0.0005	2.5363e-23
RV	11	22110565	31.4883	-0.0367	-0.0149	0.0001	3.25748e-32
RV	12	5101221	8.4426	0.0084	0.0453	0.0001	3.61133e-09
RV	12	10369960	4.2619	-0.0076	0.0224	0.0001	5.473e-05
RV	12	16725068	8.9061	-0.0222	0.0194	0.0002	1.24231e-09
RV	12	22271823	5.2377	0.0049	0.0728	0.0002	5.7872e-06
RV	12	25696421	11.0072	-0.02	-0.0537	0.0001	9.84393e-12
RL	1	11536272	16.2565	-7.2077	-2.9118	14.9321	5.54701e-17
RL	1	31806016	3.7687	0.008	43.1867	12.3074	0.00017037
RL	2	2426274	5.3401	-2.2344	30.3076	14.139	4.5715e-06
RL	5	10495289	15.558	-6.9626	2.0637	14.0642	2.77084e-16
RL	6	8986351	8.36	3.207	50.9259	16.8817	4.36816e-09
RL	7	8259117	18.2023	-0.3111	98.766	74.8835	6.28631e-19
RL	7	29441350	14.2385	-11.495	1.1587	35.506	5.78131e-15
RL	8	11284825	7.65	-3.5322	11.7986	16.472	2.24034e-08
RL	8	15489645	6.9048	-3.1593	21.7948	16.221	1.24585e-07
RL	8	16928269	27.9889	10.0875	6.6936	7.1678	1.02834e-28
RL	8	17147605	17.8493	-7.3115	-3.7963	9.6915	1.41693e-18
RL	10	476384	8.1762	4.836	-11.5682	18.4397	6.67023e-09
RL	10	13421732	17.6193	7.5266	1.582	7.6711	2.40613e-18
RL	11	2890280	5.3507	-3.6927	-1.5003	12.2763	4.46214e-06
RL	12	23344286	9.9582	4.5265	12.5009	24.1161	1.10184e-10
